# Supplementary material for: Pyrene-Containing Polyamines as Fluorescent Receptors for Recognition of PFOA in Aqueous Media
Source: MDPI journal article supplement (doi:10.3390/molecules28114552), 2023-06-05
Supplement: s1 [file s1]

# Pyrene containing polyamines as fluorescent receptors for the recognition of PFOA in aqueous media

Yschtar Tecla Simonini Steiner, Giammarco Maria Romano, Matteo Savastano, Lara Massai, Martina Lippi, Paola Paoli, Patrizia Rossi and Andrea Bencini

## Supplementary Materials (SM)

### Contents

|                                                                                                             |    |
|-------------------------------------------------------------------------------------------------------------|----|
| Synthesis of 1-(1-Methylpyrenyl)-1,4,7-triazaheptane (L1).....                                              | 3  |
| Figure S1. <sup>1</sup> H NMR spectrum of compound L1 in CD <sub>3</sub> OD/D <sub>2</sub> O.....           | 3  |
| Figure S2. <sup>1</sup> H NMR spectrum of compound L1 in DMSO-d <sub>6</sub> .....                          | 4  |
| Figure S3. <sup>1</sup> H- <sup>1</sup> H -COSY NMR spectrum of compound L1.....                            | 5  |
| Figure S4. <sup>13</sup> C NMR spectrum of compound L1.....                                                 | 5  |
| Figure S5. HR-ESI MS of compound L1.....                                                                    | 6  |
| Figure S6. Isotopic pattern of the [L1+H] <sup>+</sup> (z = 1) ion.....                                     | 6  |
| Figure S7. <sup>1</sup> H NMR spectrum of compound L2 in CDCl <sub>3</sub> /CD <sub>3</sub> OD.....         | 7  |
| Figure S8. <sup>1</sup> H NMR spectrum of compound L2 in DMSO-d <sub>6</sub> .....                          | 8  |
| Figure S9. <sup>1</sup> H- <sup>1</sup> H -COSY NMR spectrum of compound L2.....                            | 9  |
| Figure S10. <sup>13</sup> C NMR spectrum of compound L2.....                                                | 10 |
| Figure S11. HR-ESI MS of compound L2.....                                                                   | 11 |
| Figure S12. Isotopic pattern of the [L2+H] <sup>+</sup> (z = 1) ion.....                                    | 11 |
| Figure S13. Absorption spectra of L1 and L2 at different pH values.....                                     | 12 |
| Figure S14. Absorption spectra of L1 at pH 7 in the presence of increasing amount of PFOA.....              | 12 |
| Figure S15. Absorption and emission spectra of L2 at pH 7 in the presence of increasing amount of PFOA..... | 13 |
| Figure S16. Emission spectra of L1 and L2 at pH 7 in the presence of increasing amount of PFOS.....         | 13 |
| Figure S17. Absorption spectra of L1 at pH 4 in the presence of increasing amount of PFOA.....              | 14 |
| Figure S18. Absorption and emission spectra of L2 at pH 4 in the presence of increasing amount of PFOA..... | 14 |
| Figure S19. Emission spectra of L1 and L2 at pH 4 in the presence of increasing amount of PFOS.....         | 15 |

|                                                                                                                                                             |    |
|-------------------------------------------------------------------------------------------------------------------------------------------------------------|----|
| <b>Figure S20:</b> Emission spectra of <b>L1</b> and <b>L2</b> at pH 4 in the presence of increasing amount of PFOA at 35°C308 K.....                       | 15 |
| <b>Figure S21:</b> Emission spectra of <b>L1</b> and <b>L2</b> at pH 4 in the presence of increasing amount of PFOA at 15°C288 K.....                       | 15 |
| <b>Figure S22.</b> Plot of fluorescence emission $I_0/I$ of <b>L1</b> and <b>L2</b> at pH 7 in the presence of increasing amount of PFOA.....               | 16 |
| <b>Figure S23.</b> Plot of fluorescence emission $I_0/I$ of <b>L1</b> and <b>L2</b> at pH 4 in the presence of increasing amount of PFOA.....               | 16 |
| <b>Figure S24.</b> $^1\text{H}$ NMR spectra of <b>L1</b> at pH 4 in the presence of increasing amounts of PFOS.....                                         | 17 |
| <b>Figure S25.</b> $^1\text{H}$ NMR spectra of <b>L1</b> at pH 7 in the presence of increasing amounts of PFOA.....                                         | 18 |
| <b>Figure S26.</b> $^1\text{H}$ NMR spectra of <b>L2</b> at pH 7 in the presence of increasing amounts of PFOA.....                                         | 19 |
| <b>Figure S27.</b> $^{19}\text{F}$ NMR spectra of PFOA at pH 7 in the presence of increasing amounts of <b>L1</b> .....                                     | 19 |
| <b>Figure S28:</b> Emission spectra of <b>L1</b> and <b>L2</b> at pH 4 in the presence of different interfering agents. ....                                | 20 |
| <b>Figure S29:</b> Emission spectra of <b>L1</b> and <b>L2</b> at pH 4 in the presence of 100 equivs. of PFOA and 200 equivs. of interfering agent.....     | 21 |
| <b>Figure S30.</b> Absorption spectra of <b>L1</b> in the presence of increasing amount of Zn(II).....                                                      | 21 |
| <b>Figure S31.</b> Absorption and emission spectra of <b>L2</b> in the presence of increasing amount of Zn(II).....                                         | 22 |
| <b>Figure S32.</b> Absorption spectra of $[\text{ZnL1}]^{2+}$ in the presence of increasing amount of PFOA.....                                             | 22 |
| <b>Figure S33.</b> Absorption and emission spectra of $[\text{ZnL2}]^{2+}$ in the presence of increasing amount of PFOA.....                                | 23 |
| <b>Figure S34.</b> Plot of fluorescence emission $I_0/I$ of $[\text{ZnL1}]^{2+}$ and $[\text{ZnL2}]^{2+}$ in the presence of increasing amount of PFOA..... | 23 |
| <b>Figure S35:</b> FT-IR solid state spectra of PFOA sodium salt and the $\text{ZnL1(PFOA)Cl}$ complex.....                                                 | 24 |
| <b>Figure S36:</b> FT-IR solid state spectra of PFOA sodium salt and the $\text{ZnL2(PFOA)Cl}$ complex.....                                                 | 25 |
| <b>Figure S37.</b> Emission spectra of $[\text{ZnL1}]^{2+}$ and $[\text{ZnL2}]^{2+}$ at pH 8 in the presence of increasing amount of PFOS.....              | 25 |
| <b>Table S1.</b> Bond distances and angles defining the Zn(II) coordination environment in the crystal structure of <b>6</b> .....                          | 25 |
| <b>Table S2.</b> Crystallographic data and refinement parameters for <b>6</b> .....                                                                         | 25 |

### Synthesis of 1-(1-Methylpyrenyl)-1,4,7-triazaheptane (L1).

A solution of diethylenetriamine (2.23 g, 21.7 mmol) in dry CH<sub>2</sub>Cl<sub>2</sub> was added to a solution of pyrene-1-carbaldehyde (0.5 g, 2.17 mmol) in dry CH<sub>2</sub>Cl<sub>2</sub>. The mixture was refluxed with magnetic stirring for 3 h under nitrogen atmosphere and then overnight at room temperature. The solution was recovered by filtration and concentrated by evaporation under vacuum. The resulting oil was dissolved in dry ethanol (50 mL) and stirred with NaBH<sub>4</sub> (0.246 g, 6.51 mmol) at 333 K for 2 h and at room temperature for 6 h. The resultant was concentrated by evaporation, dissolved in CH<sub>2</sub>Cl<sub>2</sub>, washed with an aqueous NaOH solution (2 mol/L, 30 mL × 4). The organic layers were collected and dried over Na<sub>2</sub>SO<sub>4</sub>. After solvent removal under vacuum a yellow oil was obtained. The product was dissolved in ethanol (20 mL) and HCl (37%,) was dropwise added to the resulting solution, affording the tris-hydrochloride salt of **L1** (**L1**·3HCl) as a yellow solid. Yield 768 mg (85%). Anal. calcd. for C<sub>21</sub>H<sub>26</sub>Cl<sub>3</sub>N<sub>3</sub>: C 59.10, H 6.14, N 9.85. Found: C 58.78, H 6.46, N 9.13. <sup>1</sup>H NMR (CD<sub>3</sub>OD + 30% D<sub>2</sub>O, 400 MHz): δ(ppm) 8.30-8.22 (m, 5H, H4-5-6-9-10), 8.16-8.07 (m, 4H, H2-3-7-8), 3.26 (t, 2H, 2<sub>AL</sub>), 3.08 (t, 2H, 4<sub>AL</sub>), 2.98 (t, 2H, 3<sub>AL</sub>), 2.91 (t, 2H, 5<sub>AL</sub>). <sup>13</sup>C NMR (DMSO-d<sub>6</sub>, 400 MHz): δ(ppm) 131.89, 131.20, 130.70, 129.68, 129.53, 128.69, 127.7, 127.08, 126.29, 126.14, 125.81, 125.29, 124.38, 124.13, 123.87. ESI MS (m/z) 318.19571 (z = 1, [**L1** + H]<sup>+</sup>).

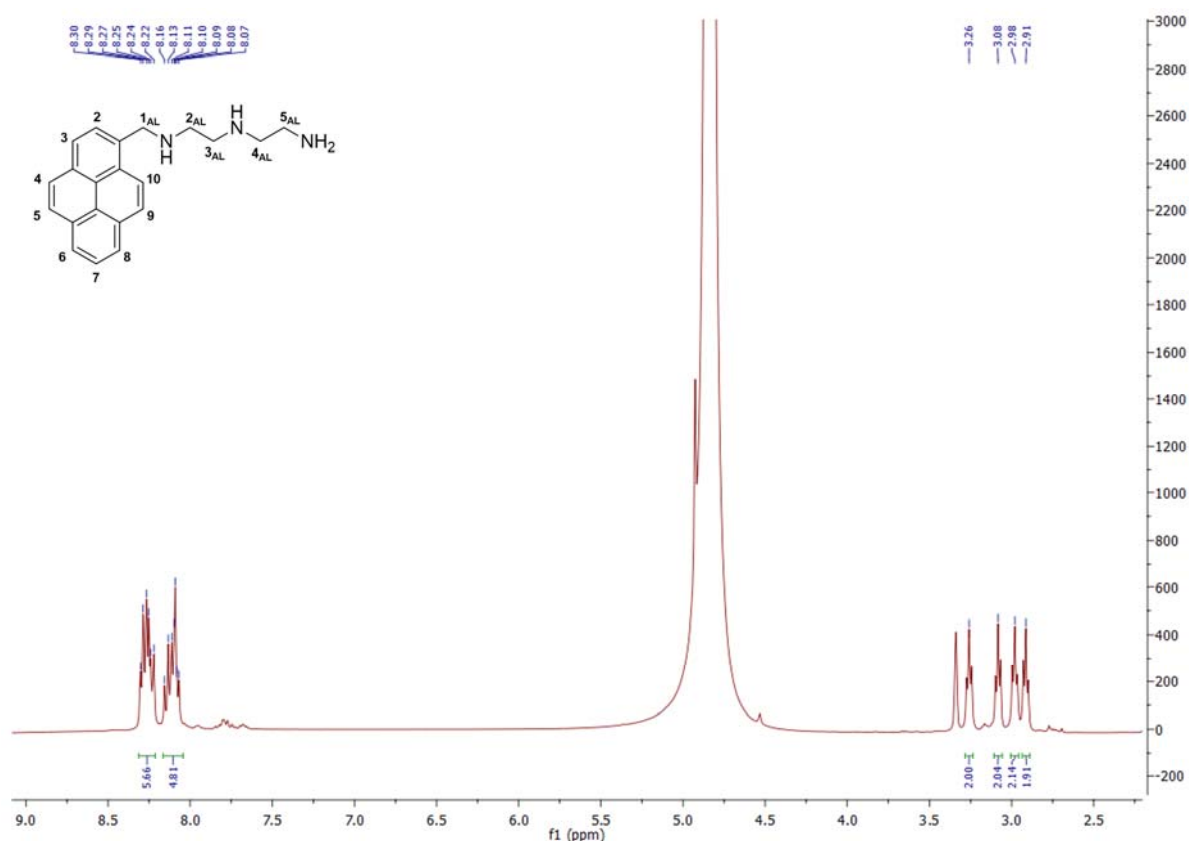

**Figure S1.** <sup>1</sup>H NMR spectrum of compound **L1** (CD<sub>3</sub>OD + 30% D<sub>2</sub>O, 400 MHz): δ(ppm) 8.30-8.22 (m, 5H, H4-5-6-9-10), 8.16-8.07 (m, 4H, H2-3-7-8), 3.26 (t, 2H, 2<sub>AL</sub>), 3.08 (t, 2H, 4<sub>AL</sub>), 2.98 (t, 2H, 3<sub>AL</sub>), 2.91 (t, 2H, 5<sub>AL</sub>).

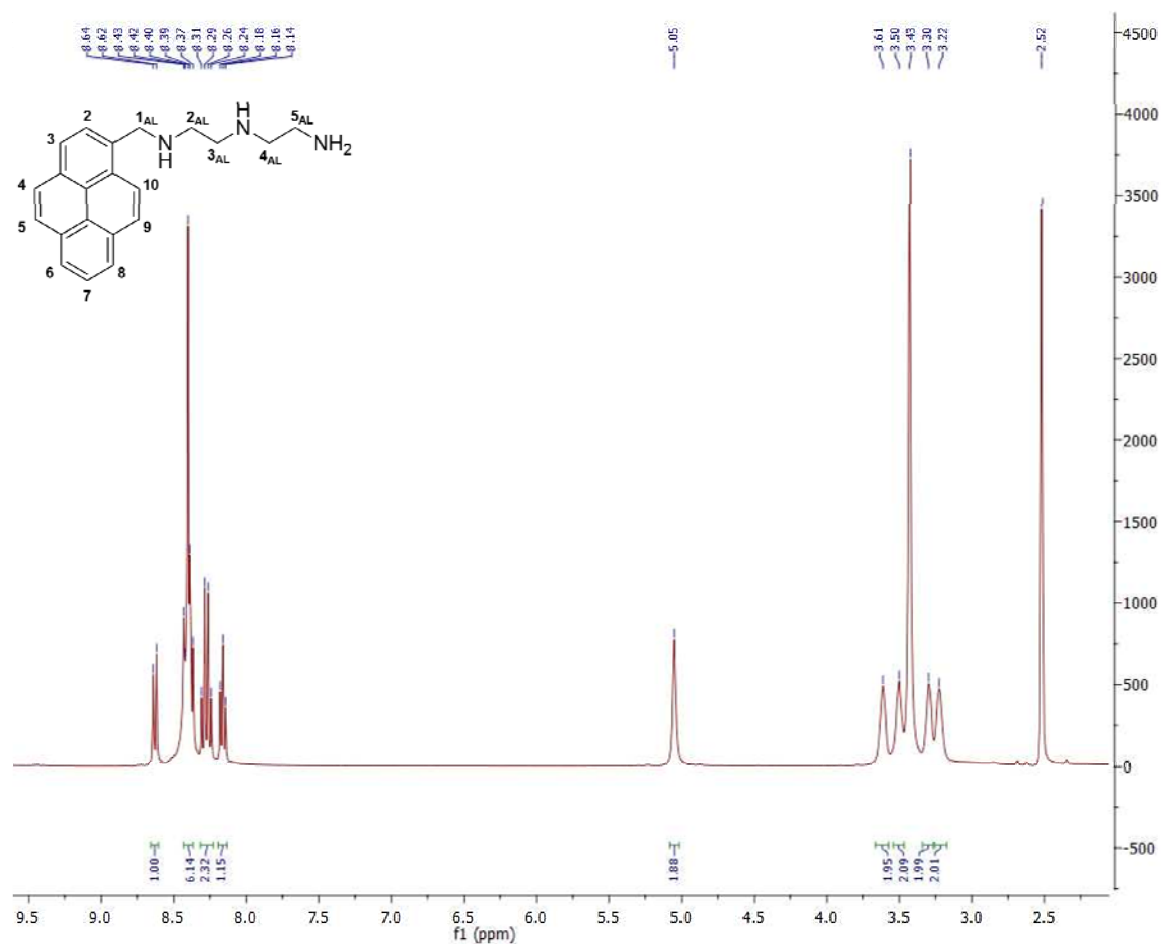

**Figure S2.**  $^1\text{H}$  NMR spectrum of compound **L1** ( $\text{DMSO-d}_6$ , 400 MHz):  $\delta(\text{ppm})$  8.63 (1H, d), 8.37-8.43 (5H, m), 8.31-8.24 (2H, m), 8.16 (1H, t), 5.05 (2H, s), 3.61 (2H, broad singlet), 3.50 (2H, broad singlet), 3.30 (2H, br s), 3.22 (2H, broad singlet).

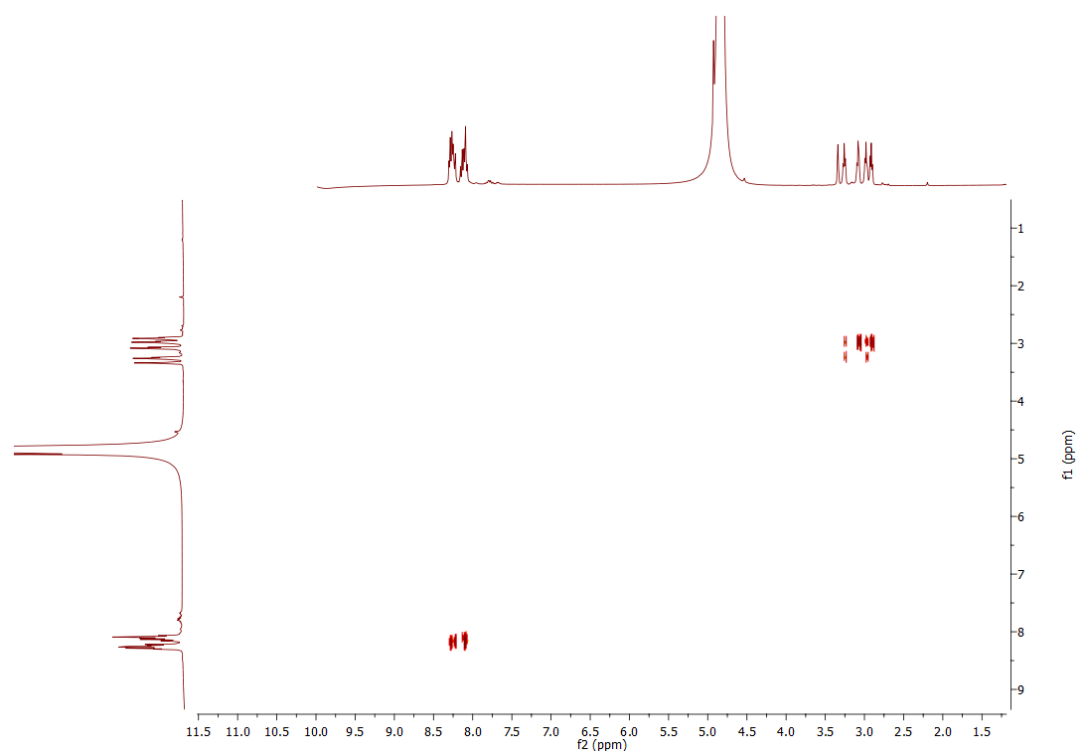

**Figure S3.**  $^1\text{H}$ - $^1\text{H}$ -COSY NMR spectrum of compound **L1** ( $\text{CD}_3\text{OD} + 30\% \text{D}_2\text{O-d}_6$ , 400 MHz).

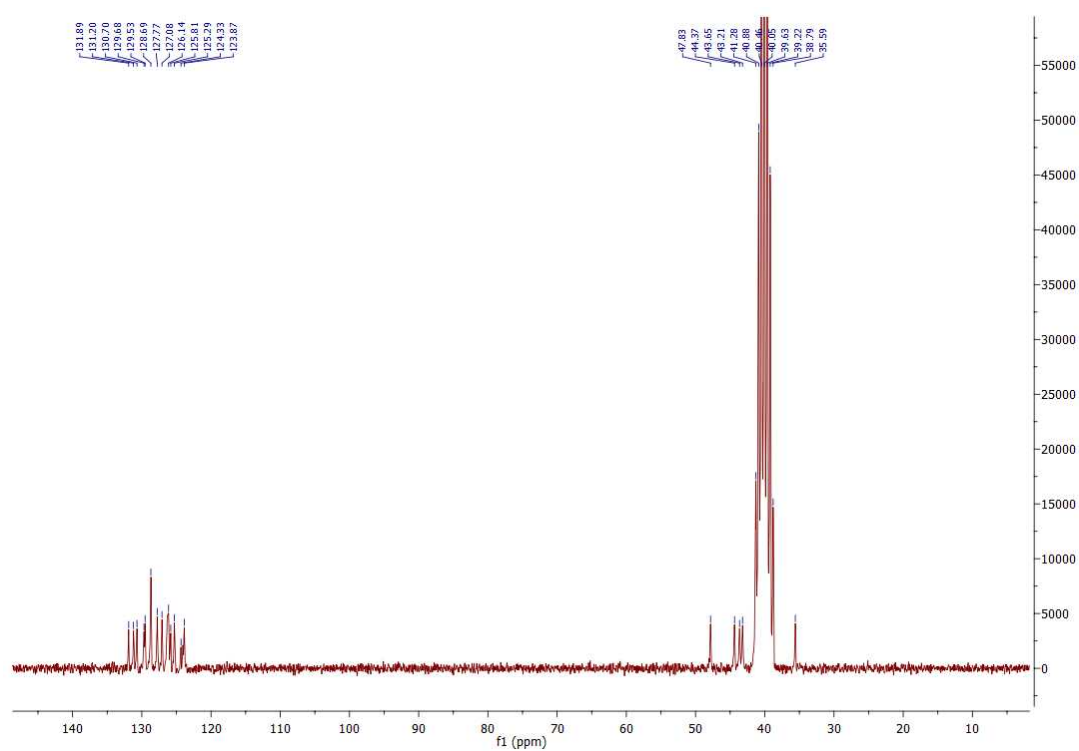

**Figure S4.**  $^{13}\text{C}$  NMR spectrum of compound **L1** ( $\text{DMSO-d}_6$ , 200 MHz):  $\delta(\text{ppm})$  131.89, 131.20, 130.70, 129.68, 129.53, 128.69, 127.77, 127.08, 126.14, 125.81, 125.29, 124.33, 123.87, 47.83, 44.37, 43.65, 43.21, 35.59.

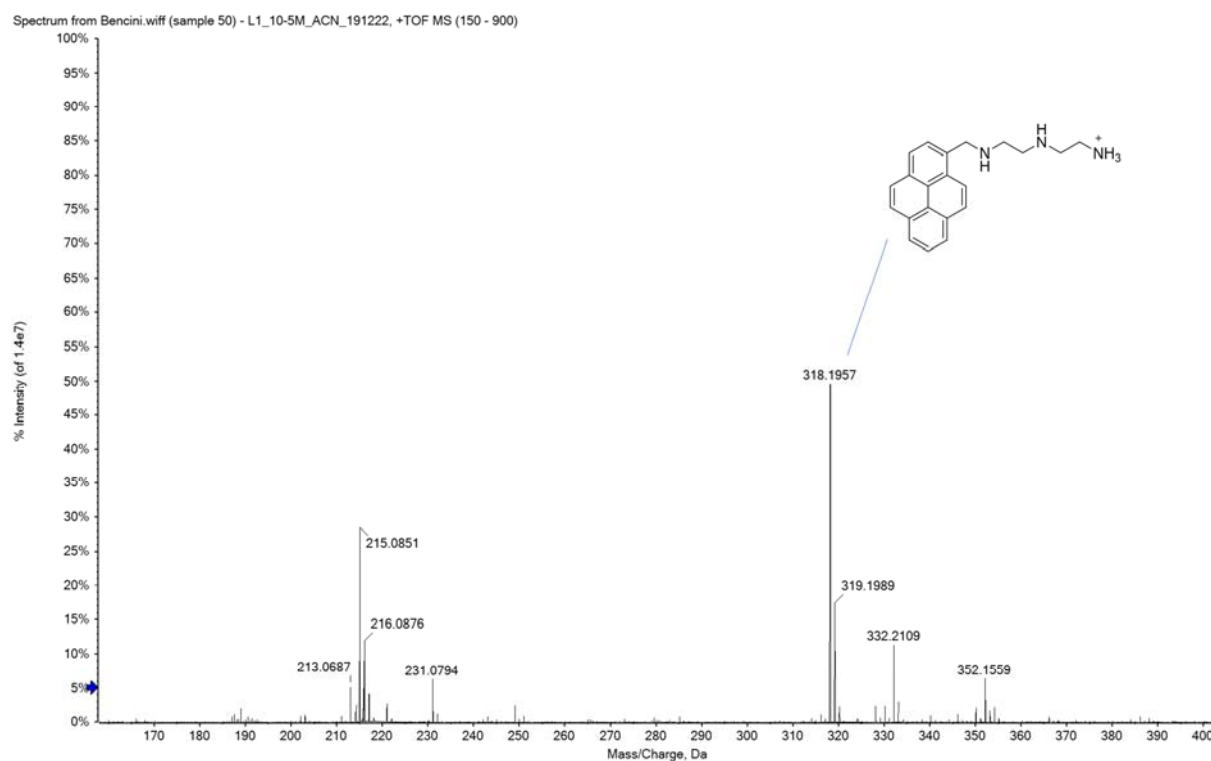

Figure S5. High resolution mass spectrum of compound L1 in CH<sub>3</sub>CN; 318.1957 ( $z = 1$ , [L1 + H]<sup>+</sup>).

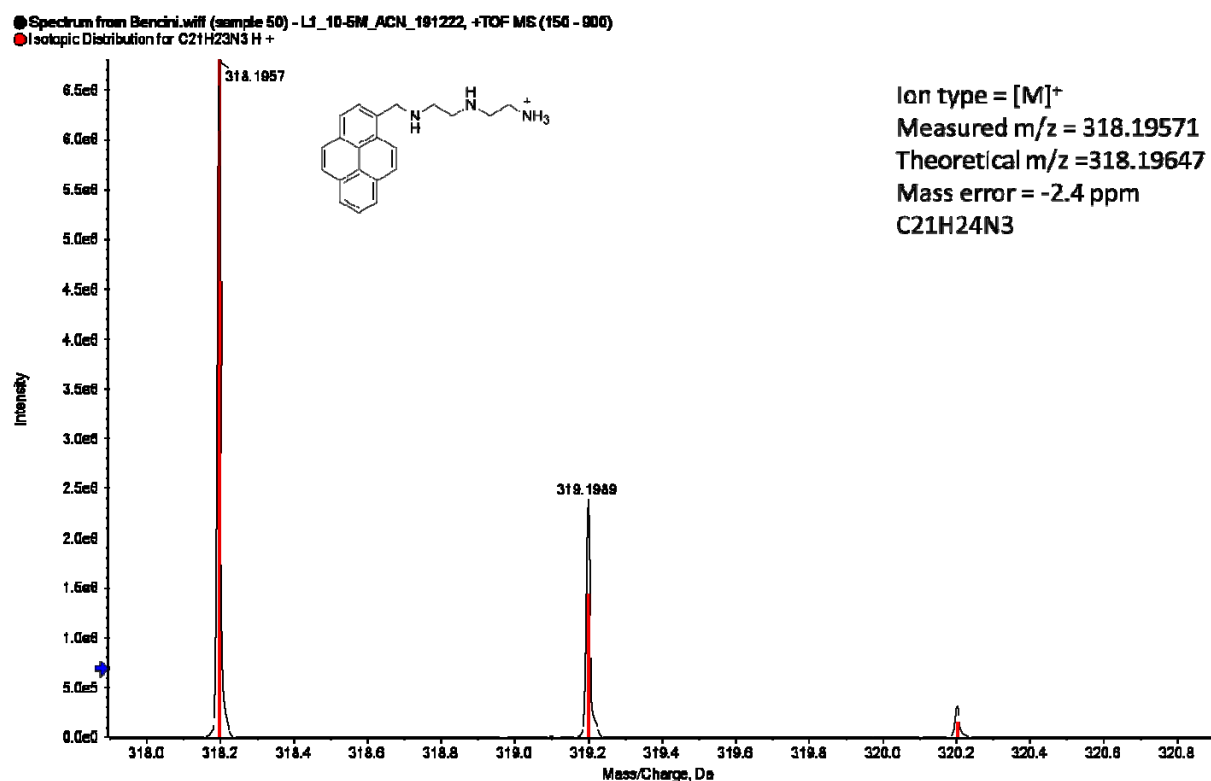

Figure S6. Isotopic pattern of the [L1+H]<sup>+</sup> ( $z = 1$ ) ion, with measured (black) and theoretical (red) m/z value of the most abundant isotopic peak, 317.9-320.9 Da region.

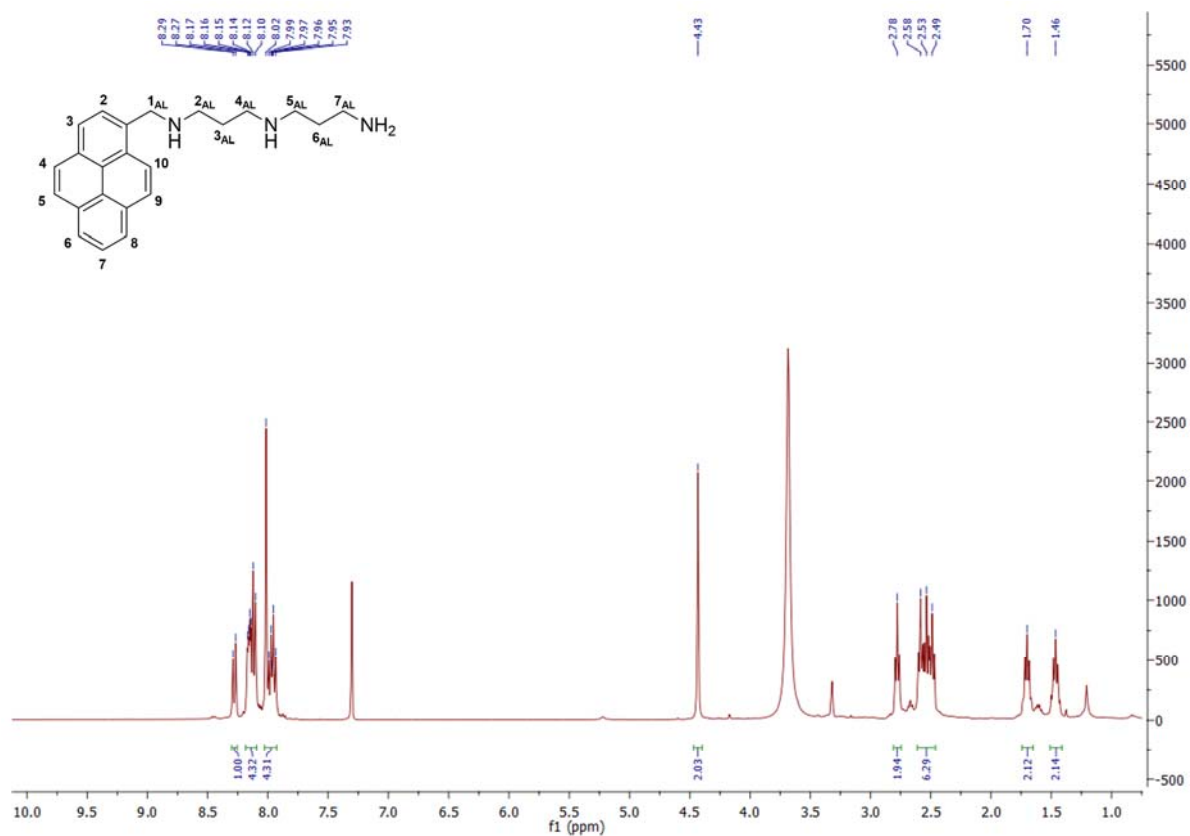

**Figure S7.** <sup>1</sup>H NMR spectrum of compound **L2** (CDCl<sub>3</sub> + 5% CD<sub>3</sub>OD, 400 MHz): δ(ppm) 8.28 (d, 1H, H<sub>6</sub>), 8.17-8.10 (m, 4H, H<sub>4</sub>-5-9-10), 8.02-7.93 (m, 4H, H<sub>2</sub>-3-7-8), 4.43 (s, 2H, 1<sub>AL</sub>), 2.78 (t, 2H, 2<sub>AL</sub>), 2.57-2.48 (m, 6H, 4-5-7<sub>AL</sub>), 1.70 (q, 2H, 3<sub>AL</sub>), 1.46 (q, 2H, 6<sub>AL</sub>).

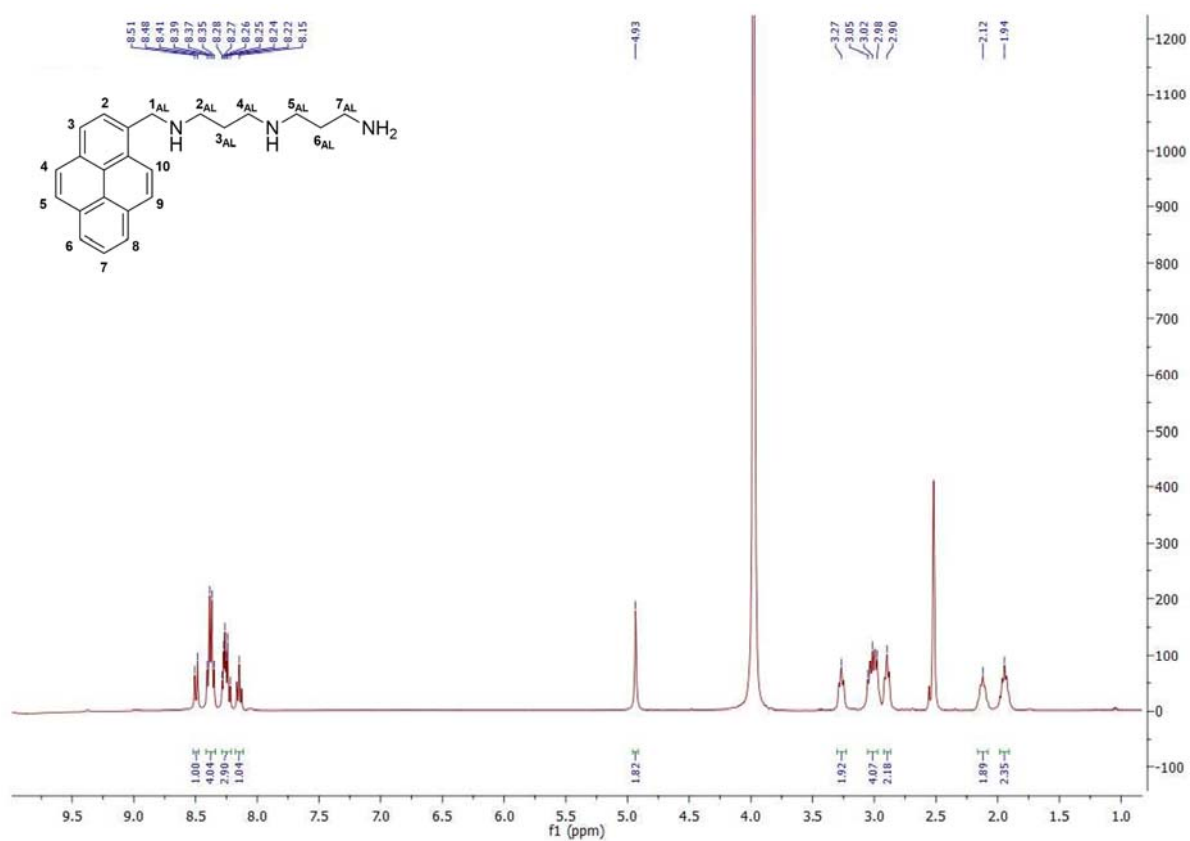

**Figure S8.** <sup>1</sup>H NMR spectrum of compound L2 (DMSO-d<sub>6</sub>, 400 MHz): δ(ppm) 8.50 (1H, d), 8.41-8.35 (4H, m), 8.28-8.22 (3H, m), 8.15 (1H, t), 4.93 (2H, s), 3.27 (2H, t), 3.05-2.98 (4H, m), 2.90 (2H, t), 2.12 (2H, quintet), 1.94 (2H, quintet).



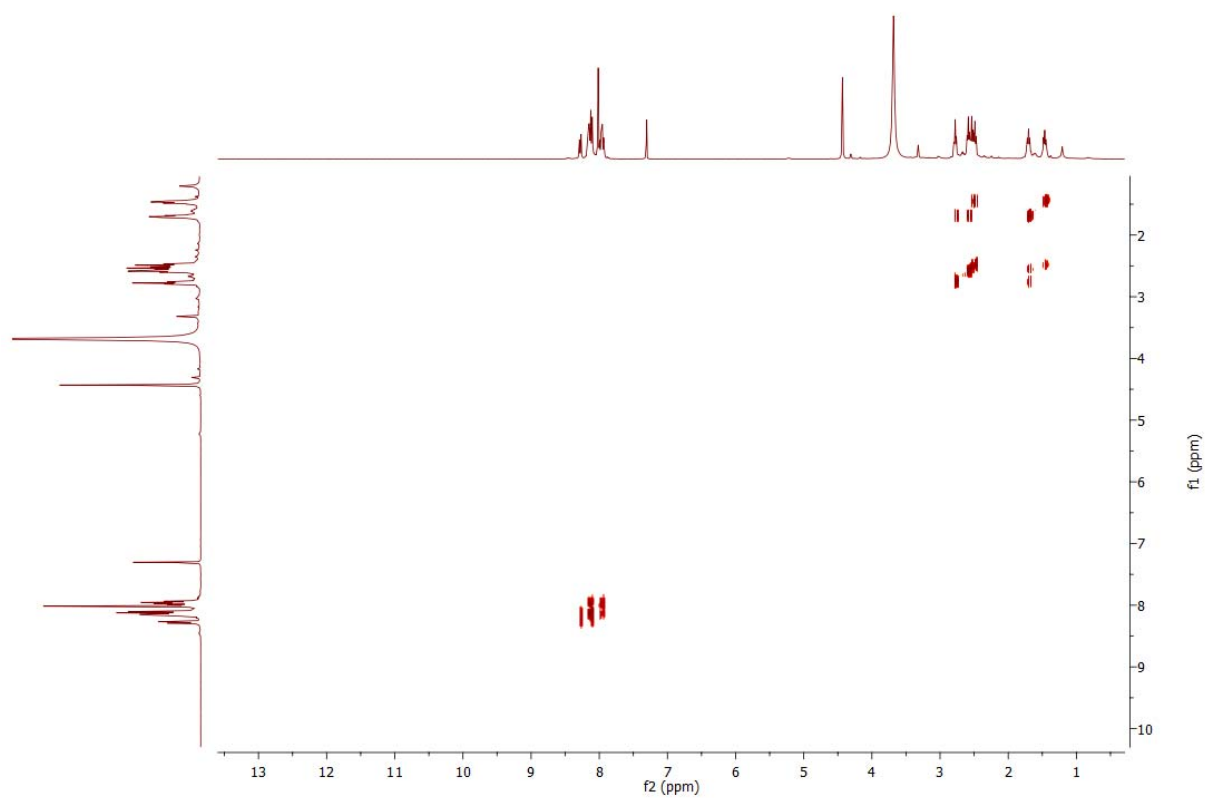

**Figure S9.**  $^1\text{H}$ - $^1\text{H}$ -COSY NMR spectrum of compound **L2** ( $\text{CDCl}_3 + 5\% \text{CD}_3\text{OD}$ , 400 MHz).

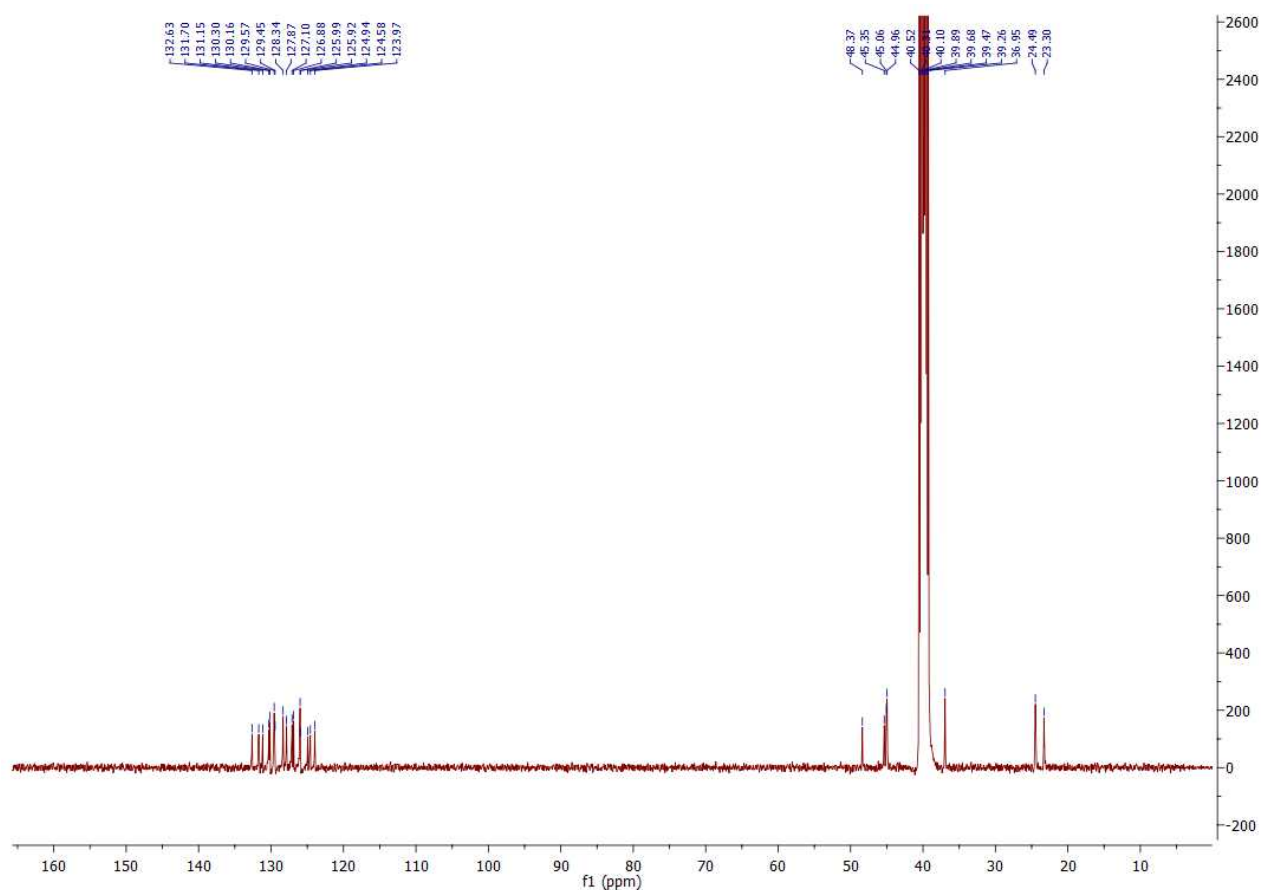

**Figure S10.**  $^{13}\text{C}$  NMR spectrum of compound **L2** (DMSO- $\text{d}_6$ , 200 MHz):  $\delta(\text{ppm})$  132.64, 131.66, 131.10, 130.31, 130.16, 129.57, 129.39, 128.35, 127.87, 127.04, 126.88, 125.92, 126.00, 124.94, 124.58, 123.97, 48.37, 45.35, 45.06, 44.97, 36.95, 24.49, 23.30.

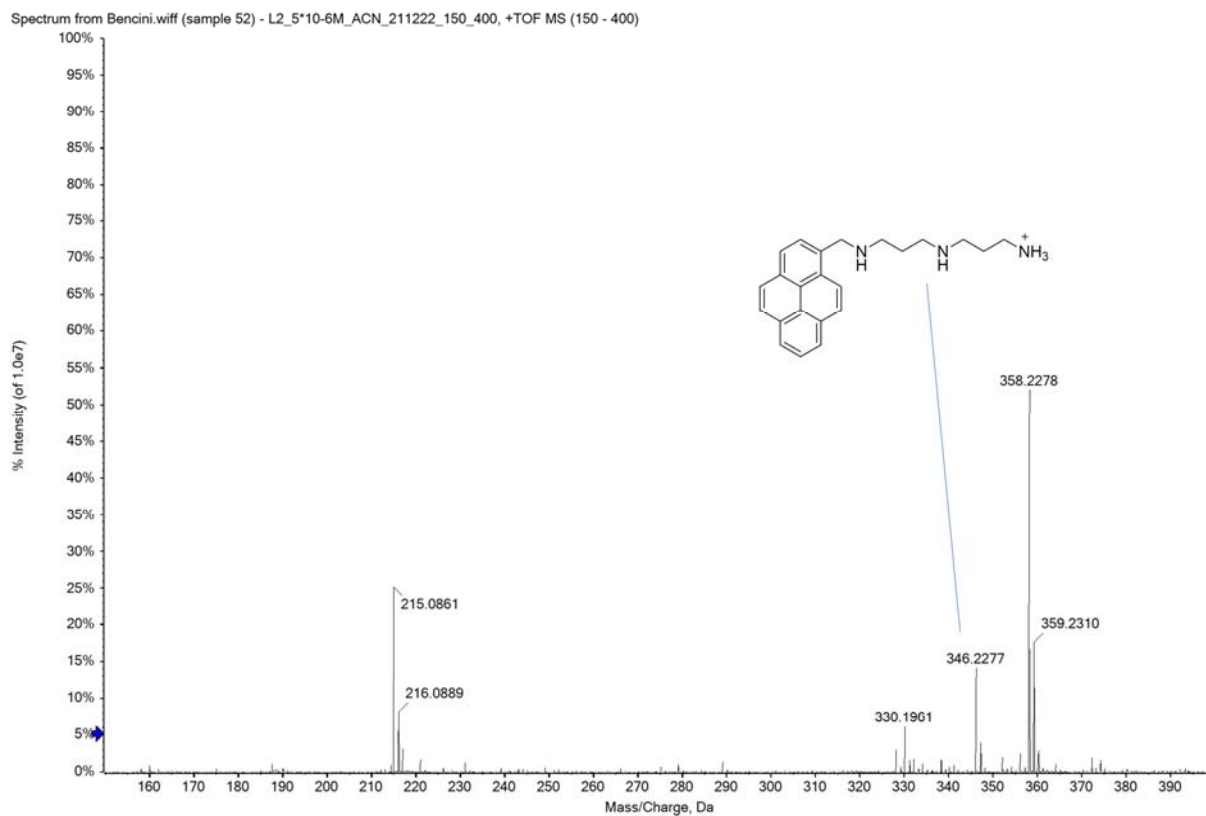

Figure S11. High resolution mass spectrum of compound L2 in CH<sub>3</sub>CN; 346.2277 ( $z = 1$ , [L1 + H]<sup>+</sup>).

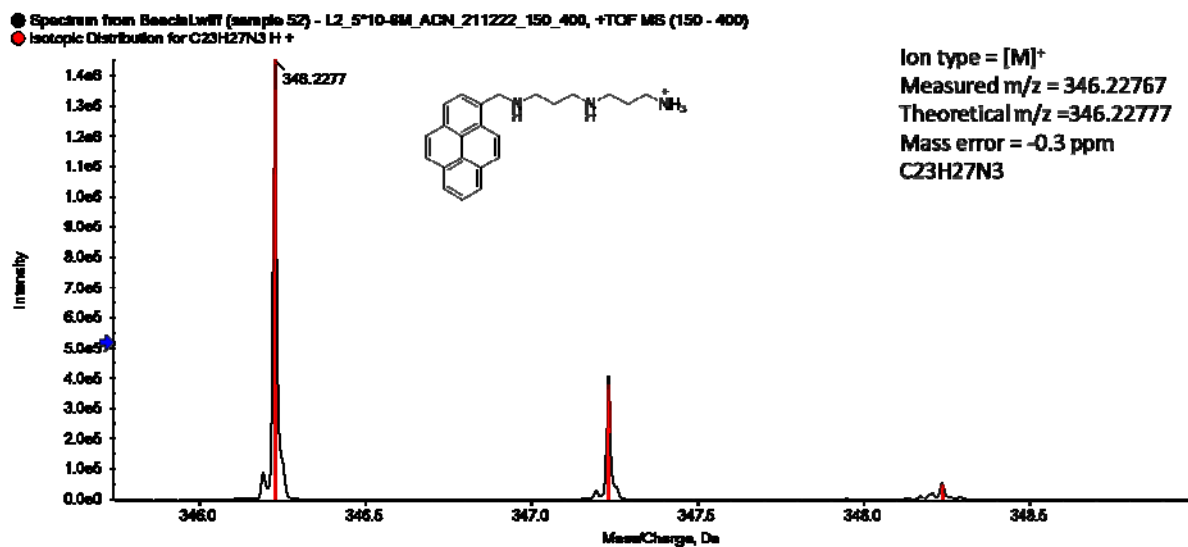

Figure S12. Isotopic pattern of the [L2+H]<sup>+</sup> ( $z = 1$ ) ion, with measured (black) and theoretical (red)  $m/z$  value of the most abundant isotopic peak, 345.7-349.1 Da region.

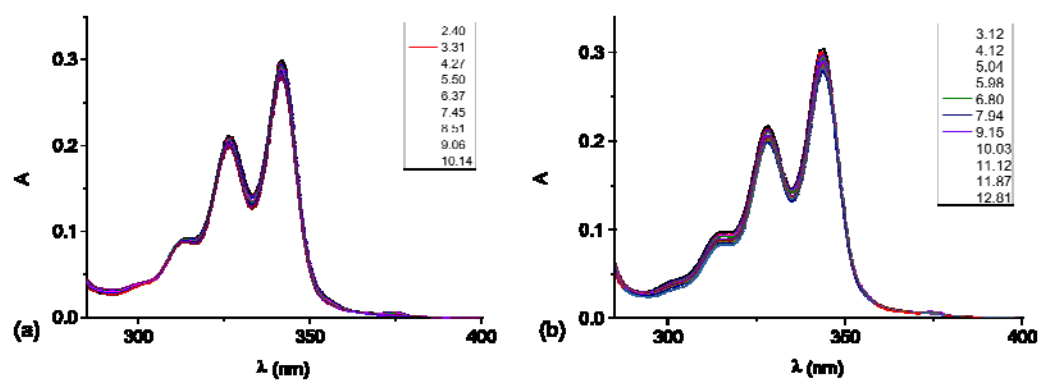

**Figure S13.** Absorption spectra of (a) L1 and (b) L2 at different pH values in H<sub>2</sub>O/EtOH (50:50 v/v). ([L1] = [L2] = 10<sup>-5</sup> M)

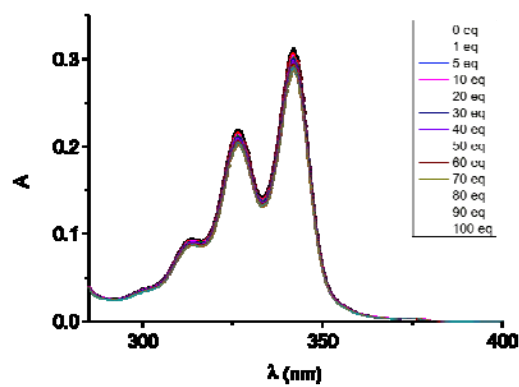

**Figure S14.** Absorption spectra of L1 in H<sub>2</sub>O/EtOH (50:50 v/v) at pH 7 (0.005 M TRIS buffer) in the presence of increasing amount of PFOA. ([L1] = 10<sup>-5</sup> M)

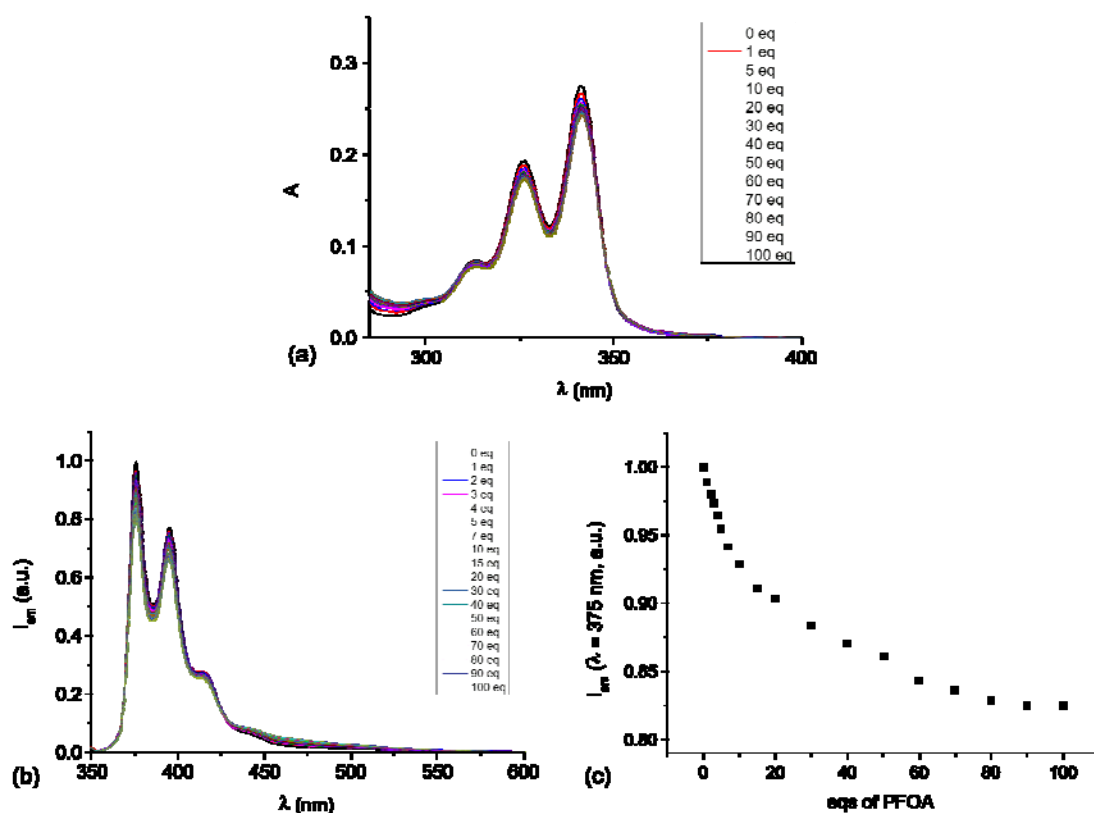

**Figure S15.** (a) Absorption and (b) emission spectra of L2 in H<sub>2</sub>O/EtOH (50:50 v/v) at pH 7 (0.005 M TRIS buffer) in the presence of increasing amount of PFOA. (c) Plot of the fluorescence emission of L2 at 375 nm. ( $[L2] = 10^{-5}$  M,  $\lambda_{exc} = 340$  nm)

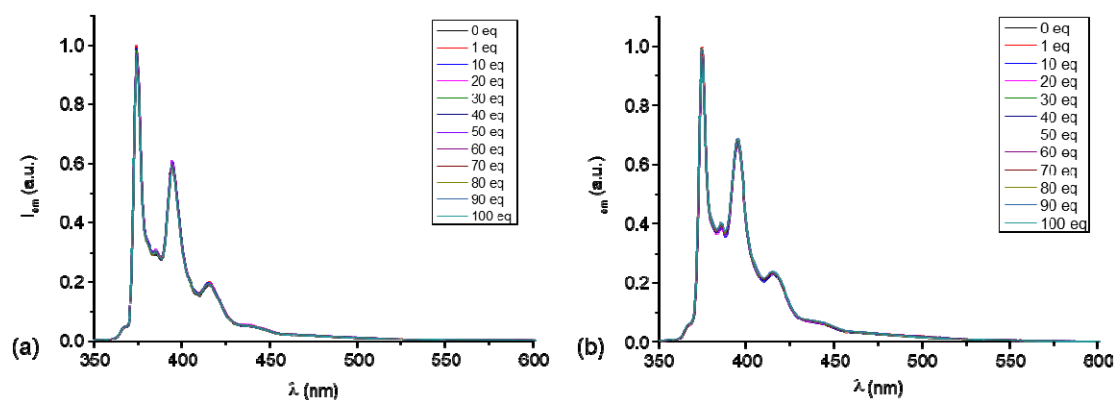

**Figure S16.** Emission spectra of (a) L1 and (b) L2 in H<sub>2</sub>O/EtOH (50:50 v/v) at pH 7 (0.005 M TRIS buffer) in the presence of increasing amount of PFOS ( $[L1] = [L2] = 10^{-5}$  M,  $\lambda_{exc} = 340$  nm).

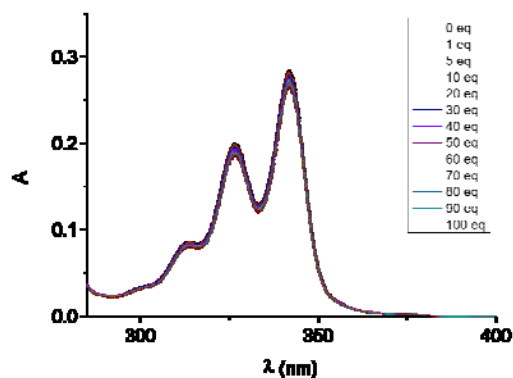

**Figure S17.** Absorption spectra of **L1** in H<sub>2</sub>O/EtOH (50:50 v/v) at pH 4 in the presence of increasing amount of PFOA. ([**L1**] = 10<sup>-5</sup> M)

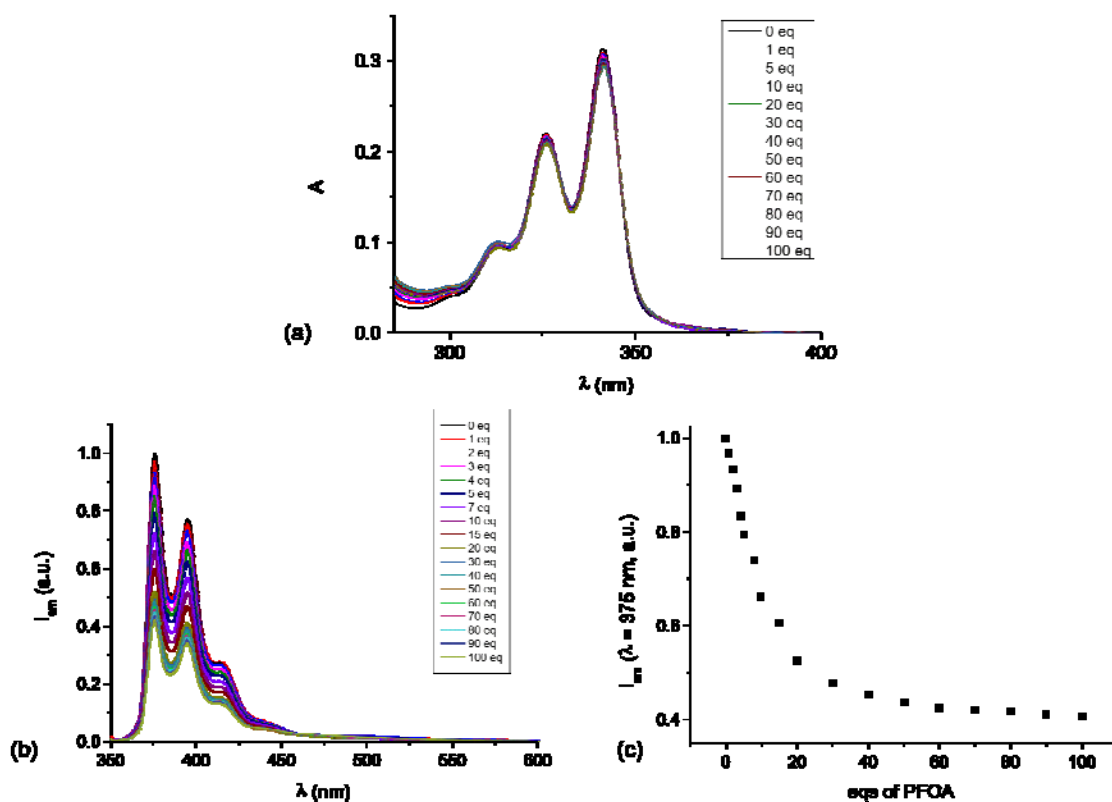

**Figure S18.** (a) Absorption and (b) emission spectra of **L2** in H<sub>2</sub>O/EtOH (50:50 v/v) at pH 4 in the presence of increasing amount of PFOA. (c) Plot of the fluorescence emission of **L2** at 375 nm. ([**L2**] = 10<sup>-5</sup> M,  $\lambda_{\text{exc}}$  = 340 nm)

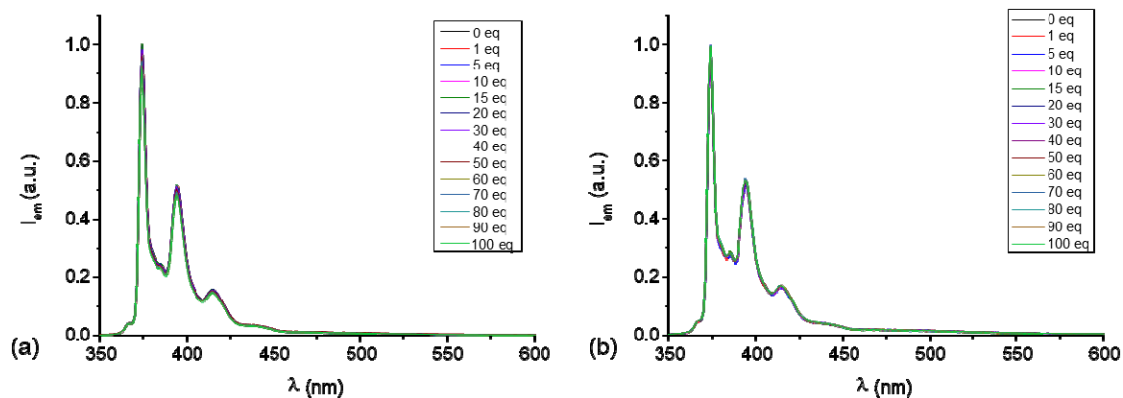

**Figure S19.** Emission spectra of (a) L1 and (b) L2 in H<sub>2</sub>O/EtOH (50:50 v/v) at pH 4 in the presence of increasing amount of PFOS ([L1] = [L2] = 10<sup>-5</sup> M,  $\lambda_{\text{exc}}$  = 340 nm).

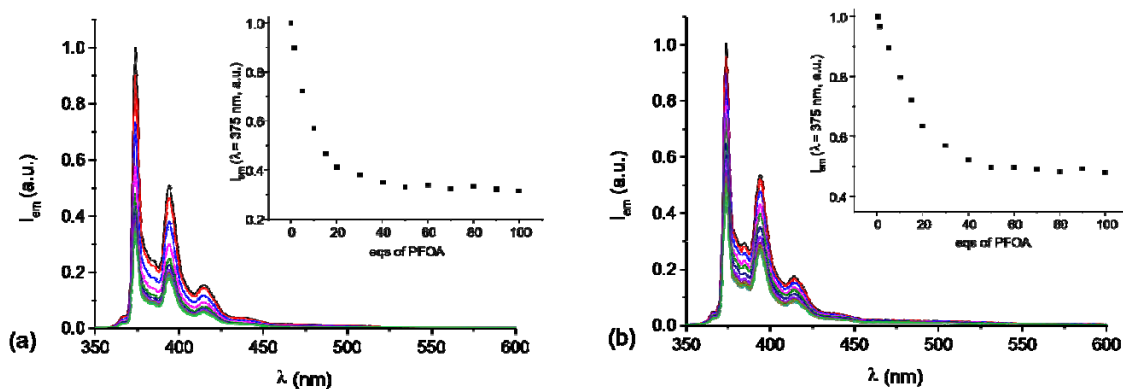

**Figure S20.** Emission spectra of (a) L1 and (b) L2 in H<sub>2</sub>O/EtOH (50:50 v/v) at pH 4 at 308 K in the presence of increasing amount of PFOA ([L1] = [L2] = 10<sup>-5</sup> M,  $\lambda_{\text{exc}}$  = 340 nm).

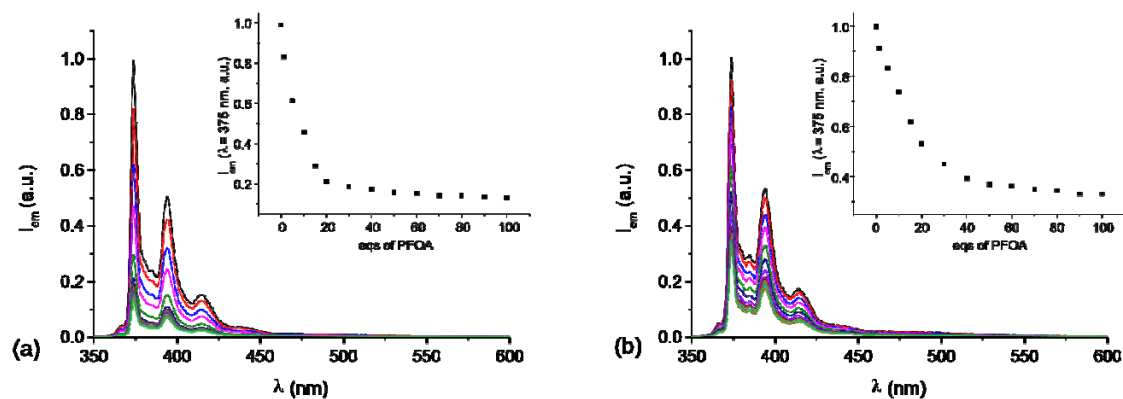

**Figure S21.** Emission spectra of (a) L1 and (b) L2 in H<sub>2</sub>O/EtOH (50:50 v/v) at pH 4 at 288 K in the presence of increasing amount of PFOA ([L1] = [L2] = 10<sup>-5</sup> M,  $\lambda_{\text{exc}}$  = 340 nm).

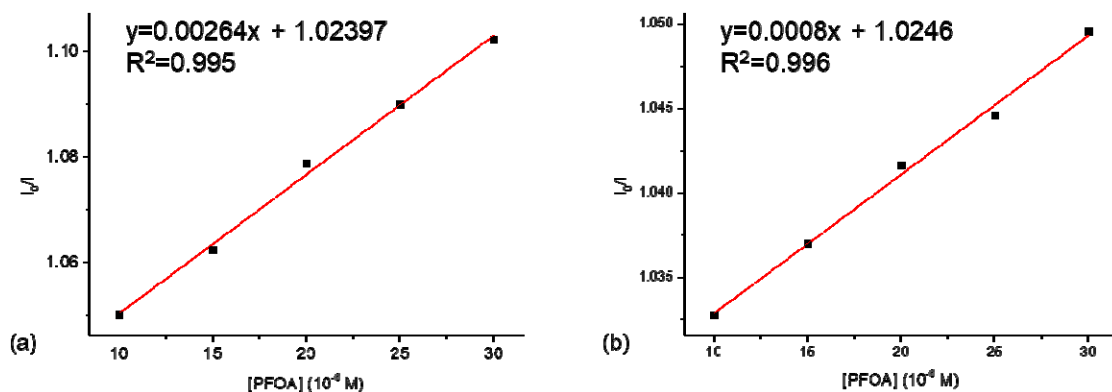

**Figure S22.** Plot of fluorescence emission  $I_0/I$  of (a) L1 ( $[L1] = 10^{-5}$  M,  $\lambda_{exc}=340$  nm,  $s=0.001015$ ) and (b) L2 ( $[L2] = 10^{-5}$  M,  $\lambda_{exc}=340$  nm,  $s=0.00182$ ) at pH 7 (0.005 M TRIS buffer) in H<sub>2</sub>O/EtOH 50:50 (v/v) in the presence of increasing amount of PFOA at 298 K. The detection limit was calculated to be 1.15  $\mu$ M for L1 and 6.8  $\mu$ M for L2.

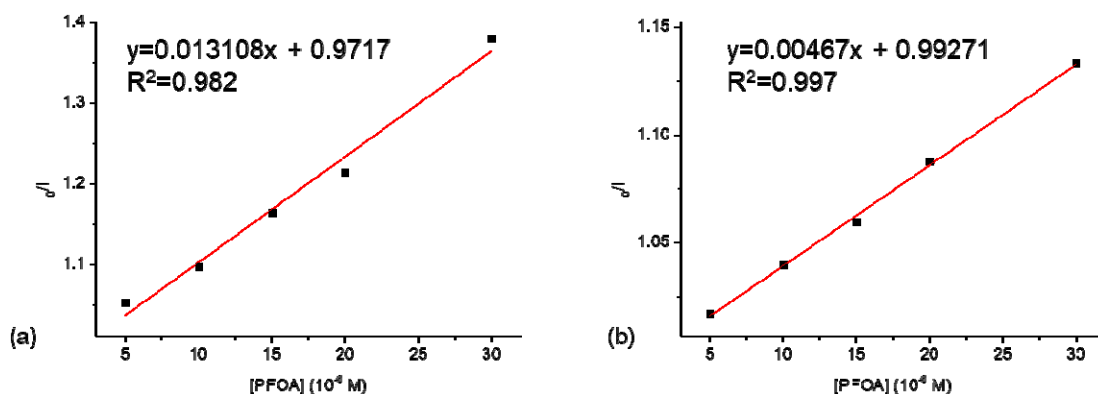

**Figure S23.** Plot of fluorescence emission  $I_0/I$  of (a) L1 ( $[L1] = 10^{-5}$  M,  $\lambda_{exc}=340$  nm,  $s=0.0009814$ ) and (b) L2 ( $[L2] = 10^{-5}$  M,  $\lambda_{exc}=340$  nm,  $s=0.0010214$ ) at pH 4 in H<sub>2</sub>O/EtOH 50:50 (v/v) in the presence of increasing amount of PFOA at 298 K. The detection limit was calculated to be 0.22  $\mu$ M for L1 and 0.66  $\mu$ M for L2.



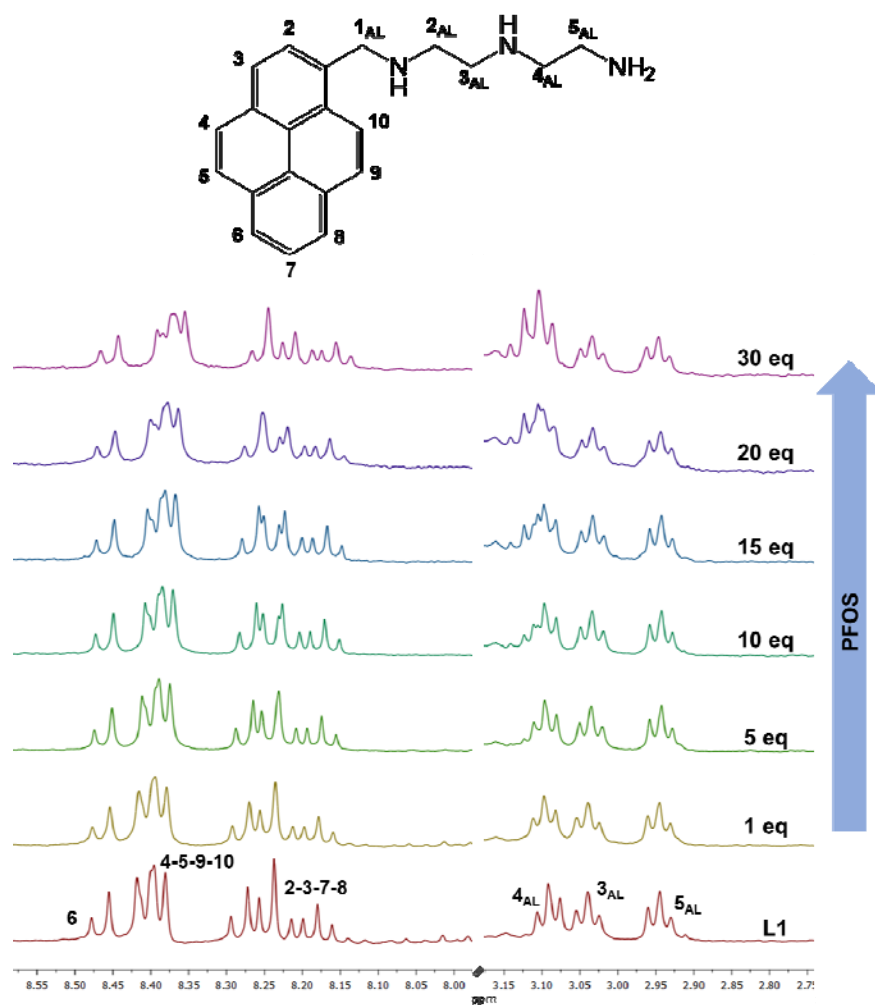

**Figure S24.**  $^1\text{H}$  NMR spectra of **L1** at pH 4  $\text{D}_2\text{O}/\text{CD}_3\text{OD}$  40:60 (v/v) in the presence of increasing amounts of PFOS at 298 K. The signals of the  $1_{\text{AL}}$  and  $2_{\text{AL}}$  methylene groups cannot be observed due to overlapping with water and the methyl group of methanol, respectively.



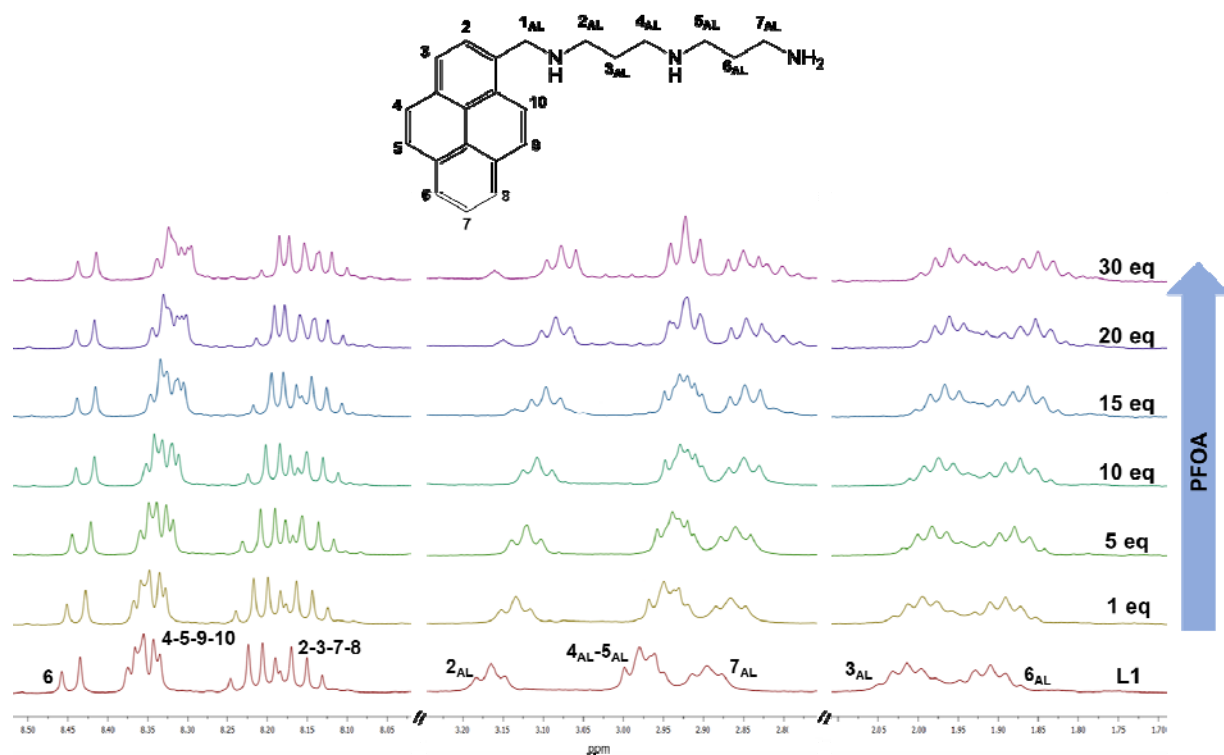

**Figure S26.**  $^1\text{H}$  NMR spectra of L2 at pH 7  $\text{D}_2\text{O}/\text{CD}_3\text{OD}$  40:60 (v/v) in the presence of increasing amounts of PFOA at 298 K. The signals of the 1<sub>AL</sub> methylene group cannot be observed due to overlapping with water.

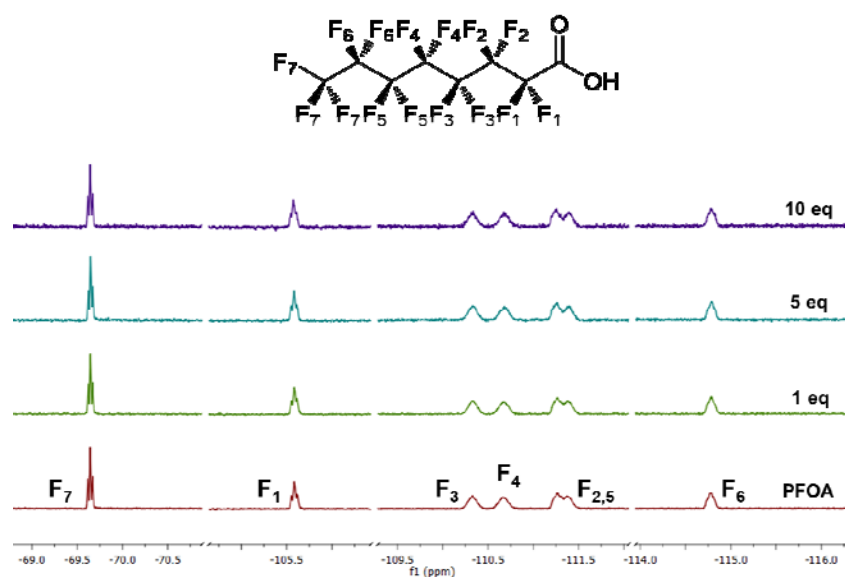

**Figure S27.**  $^{19}\text{F}$  NMR spectra of PFOA at pH 7  $\text{D}_2\text{O}/\text{CD}_3\text{OD}$  40:60 (v/v) in the presence of increasing amounts of L1 at 298 K.

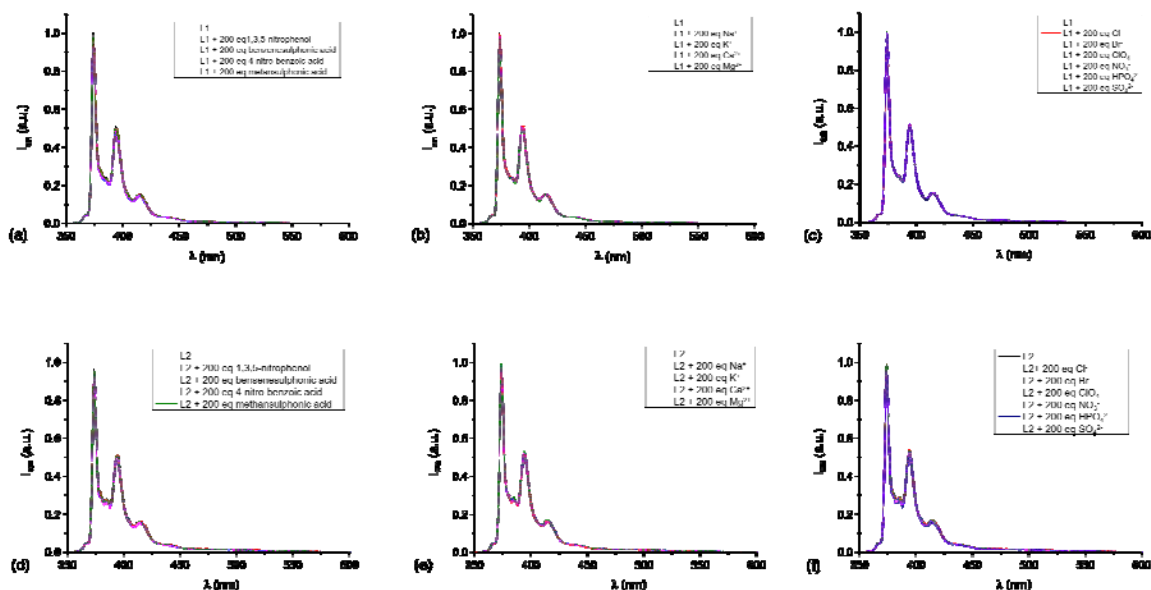

**Figure S28.** Emission spectra of **L1** (a-c) and **L2** (d-f) at pH 7 (0.005 M TRIS buffer, 298 K) in H<sub>2</sub>O/EtOH 50:50 (Vol/Vol) in the absence and in the presence of 200 equivs. of different interfering agents. ([**L1**] = 10<sup>-5</sup> M, [**L2**] = 10<sup>-5</sup> M,  $\lambda_{exc}$  = 340 nm); a) **L1** + 1,3,5-nitrophenol, benzenesulphonic acid, 4-nitro-benzoic acid or methansulphonic acid; b) **L1** + Na<sup>+</sup>, K<sup>+</sup>, Mg<sup>2+</sup> or Ca<sup>2+</sup>; c) **L1** + Cl<sup>-</sup>, Br<sup>-</sup>, ClO<sub>4</sub><sup>-</sup>, NO<sub>3</sub><sup>-</sup>, HPO<sub>4</sub><sup>2-</sup> or SO<sub>4</sub><sup>2-</sup>; d) **L2** + 1,3,5-nitrophenol, benzenesulphonic acid, 4-nitro-benzoic acid or methansulphonic acid; e) **L2** + Na<sup>+</sup>, K<sup>+</sup>, Mg<sup>2+</sup> or Ca<sup>2+</sup>; f) **L2** + Cl<sup>-</sup>, Br<sup>-</sup>, ClO<sub>4</sub><sup>-</sup>, NO<sub>3</sub><sup>-</sup>, HPO<sub>4</sub><sup>2-</sup> or SO<sub>4</sub><sup>2-</sup> (pH 7, 0.005 M TRIS buffer, 298 K, H<sub>2</sub>O/EtOH 50:50 (Vol/Vol)). The pH of the buffer was generally adjusted at 7 by addition of NaOH to a solution of TRIS.HCl. In the test with Na<sup>+</sup> as interfering agent the TRIS buffer at pH 7 was prepared starting from a TRIS.HCl solution and adjusting the pH at 7 with NMe<sub>4</sub>OH, to avoid the presence of Na<sup>+</sup> in the tested solution; in the test with Cl<sup>-</sup> as interfering agent the TRIS buffer at pH 7 was prepared by using TRIS free base and adjusting the pH at 7 with CF<sub>3</sub>SO<sub>3</sub>H, to avoid the presence of Cl in the tested solution.

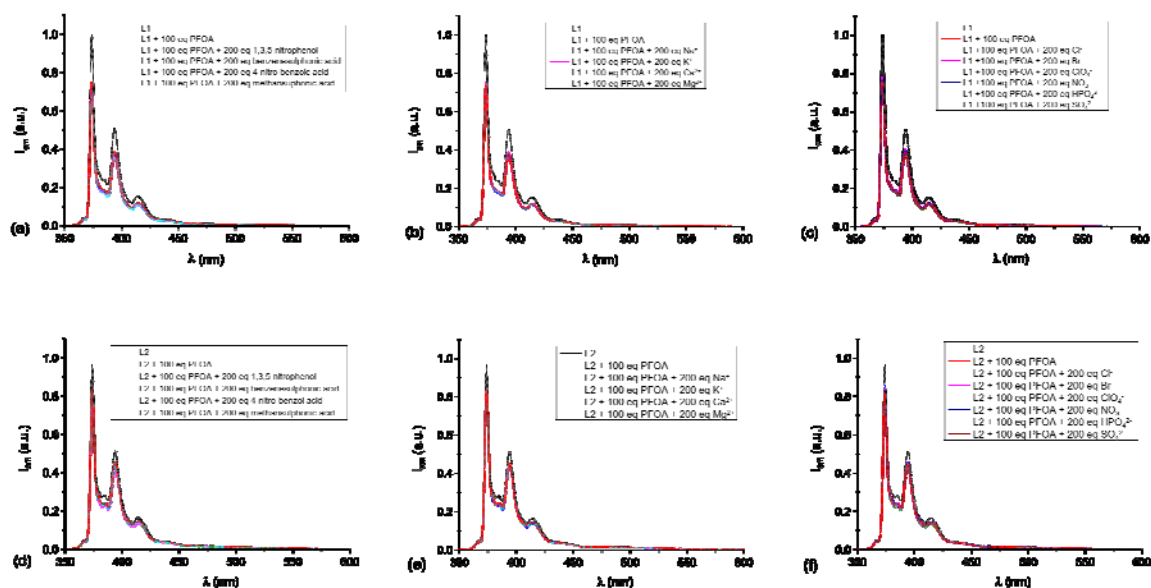

**Figure S29.** Emission spectra of L1 (a-c) and L2 (d-f), L1 and L2 with 100 equivs. of PFOA and L1 and L2 with 100 equivs. of PFOA in the presence of 200 equivs. of different interfering agents at pH 7 (0.005 M TRIS buffer, 298 K) in H<sub>2</sub>O/EtOH 50:50 (Vol/Vol) ([L1] = 10<sup>-5</sup> M, [L2] = 10<sup>-5</sup> M,  $\lambda_{exc}$  = 340 nm); a) L1 + PFOA + 1,3,5-nitrophenol, benzenesulphonic acid, 4-nitro-benzoic acid or methansulphonic acid; b) L1 + PFOA + Na<sup>+</sup>, K<sup>+</sup>, Mg<sup>2+</sup> or Ca<sup>2+</sup>; c) L1 + PFOA + Cl<sup>-</sup>, Br<sup>-</sup>, ClO<sub>4</sub><sup>-</sup>, NO<sub>3</sub><sup>-</sup>, HPO<sub>4</sub><sup>2-</sup> or SO<sub>4</sub><sup>2-</sup>; d) L2 + PFOA + 1,3,5-nitrophenol, benzenesulphonic acid, 4-nitro-benzoic acid or methansulphonic acid; e) L2 + PFOA + Na<sup>+</sup>, K<sup>+</sup>, Mg<sup>2+</sup> or Ca<sup>2+</sup>; f) L2 + PFOA + Cl<sup>-</sup>, Br<sup>-</sup>, ClO<sub>4</sub><sup>-</sup>, NO<sub>3</sub><sup>-</sup>, HPO<sub>4</sub><sup>2-</sup> or SO<sub>4</sub><sup>2-</sup> (pH 7, 0.005 M TRIS buffer, 298 K, H<sub>2</sub>O/EtOH 50:50 (Vol/Vol)). The pH of the buffer was generally adjusted at 7 by addition of NaOH to a solution of TRIS.HCl. In the test with Na<sup>+</sup> as interfering agent the TRIS buffer at pH 7 was prepared starting from a TRIS.HCl solution and adjusting the pH at 7 with NMe<sub>4</sub>OH, to avoid the presence of Na<sup>+</sup> in the tested solution; in the test with Cl<sup>-</sup> as interfering agent the TRIS buffer at pH 7 was prepared by using TRIS free base and adjusting the pH at 7 with CF<sub>3</sub>SO<sub>3</sub>H, to avoid the presence of Cl in the tested solution.

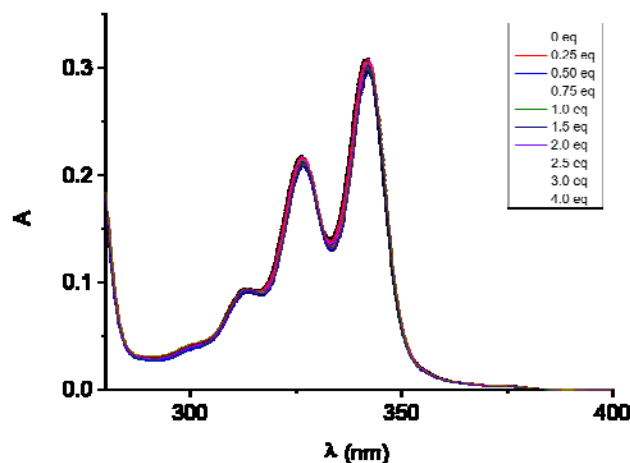

**Figure S30.** Absorption spectra of **L1** in H<sub>2</sub>O/EtOH (50:50 v/v) at pH 8 (0.005 M TRIS buffer) in the presence of increasing amount of Zn(II). ([**L1**] = 10<sup>-5</sup> M)

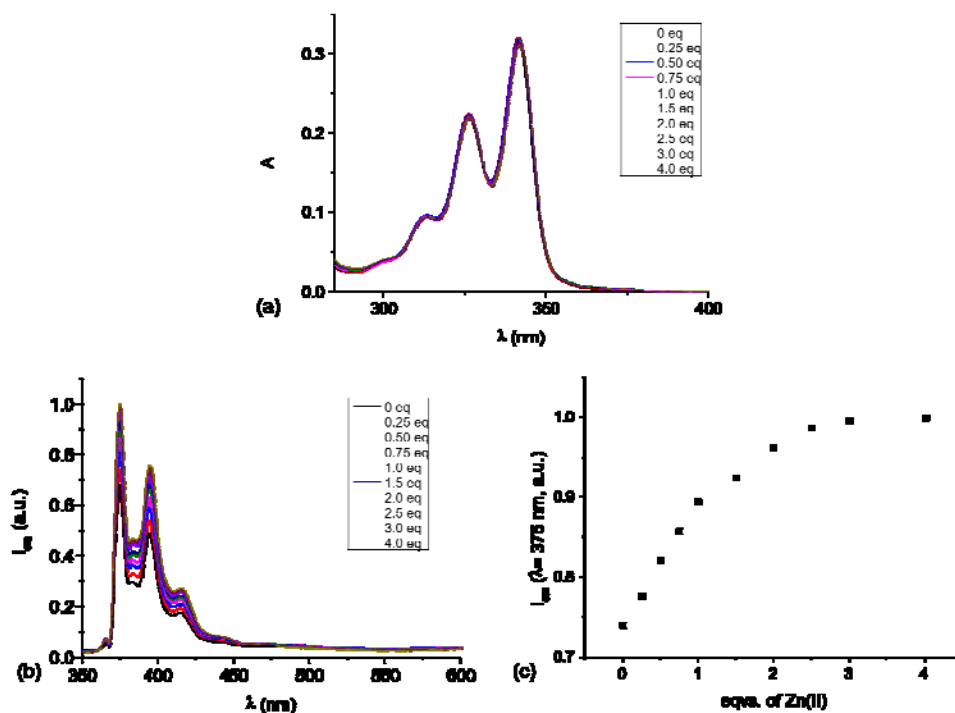

**Figure S31.** (a) Absorption and (b) emission spectra of **L2** in H<sub>2</sub>O/EtOH (50:50 v/v) at pH 8 (0.005 M TRIS buffer) in the presence of increasing amount of Zn(II). (c) Plot of the fluorescence emission of **L2** at 375 nm. ([**L2**] = 10<sup>-5</sup> M,  $\lambda_{exc}$  = 340 nm)

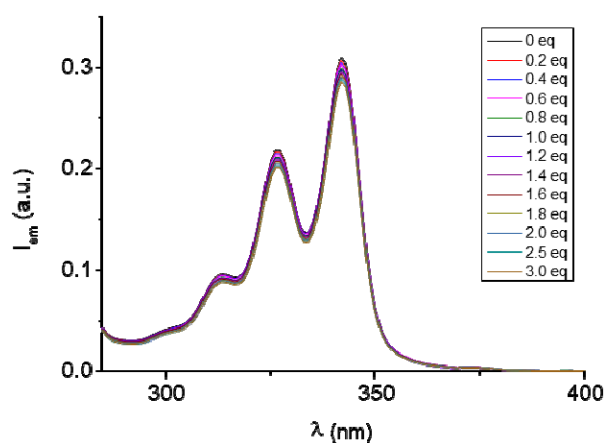

**Figure S32.** Absorption spectra of [Zn**L1**]<sup>2+</sup> in H<sub>2</sub>O/EtOH (50:50 v/v) at pH 8 (0.005 M TRIS buffer) in the presence of increasing amount of PFOA. ([Zn**L1**]<sup>2+</sup> = 10<sup>-5</sup> M)

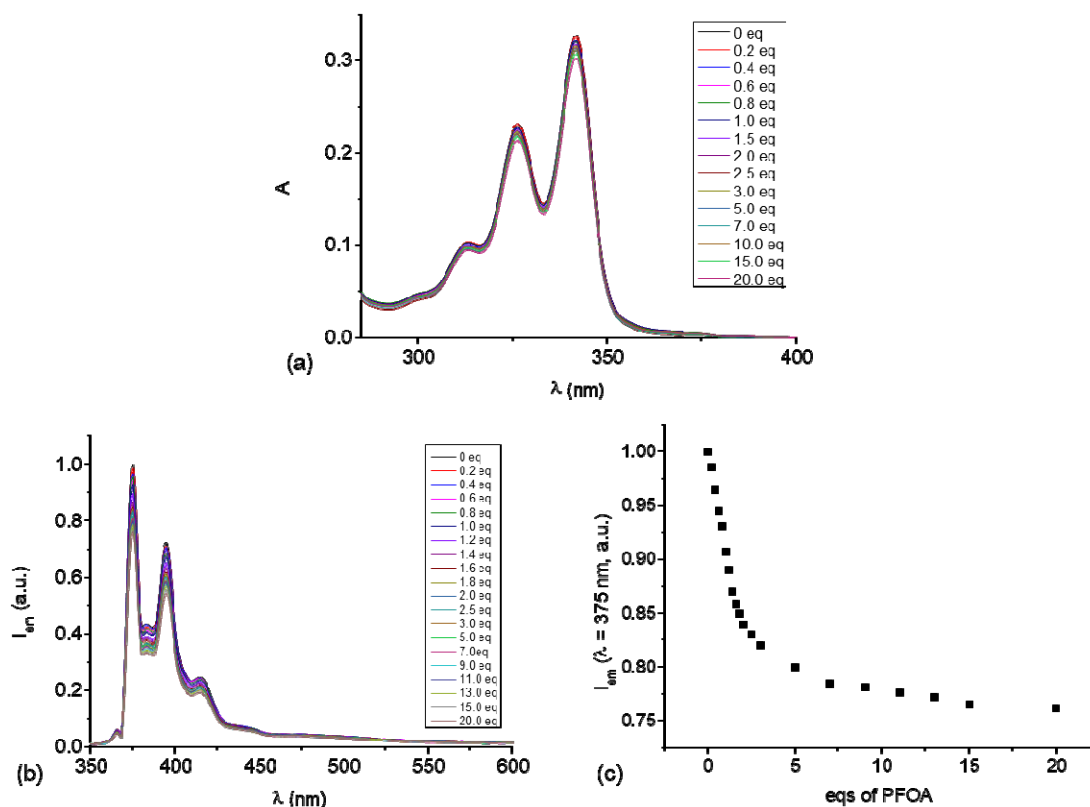

**Figure S33.** (a) Absorption and (b) emission spectra of  $[\text{ZnL2}]^{2+}$  in  $\text{H}_2\text{O}/\text{EtOH}$  (50:50 v/v) at pH 8 (0.005 M TRIS buffer) in the presence of increasing amount of PFOA. (c) Plot of the fluorescence emission of  $[\text{ZnL2}]^{2+}$  at 375 nm. ( $[\text{ZnL2}]^{2+} = 10^{-5}$  M,  $\lambda_{\text{exc}} = 340$  nm)

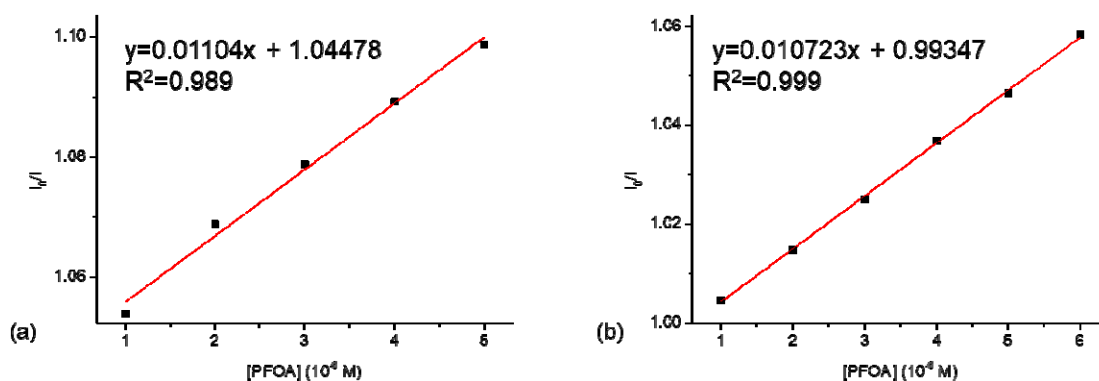

**Figure S34.** Plot of fluorescence emission  $I_0/I$  of (a)  $[\text{ZnL1}]^{2+}$  ( $[\text{ZnL1}]^{2+} = 10^{-5}$  M,  $\lambda_{\text{exc}} = 340$  nm,  $s = 0.022915$ ) and (b)  $[\text{ZnL2}]^{2+}$  ( $[\text{ZnL2}]^{2+} = 10^{-5}$  M,  $\lambda_{\text{exc}} = 340$  nm,  $s = 0.039915$ ) at pH 8 (0.005 M TRIS buffer) in  $\text{H}_2\text{O}/\text{EtOH}$  50:50 (v/v) in the presence of increasing amount of PFOA at 298 K. The detection limit was calculated to be 0.62  $\mu\text{M}$  for ZnL1 and 11.2  $\mu\text{M}$  for ZnL2.

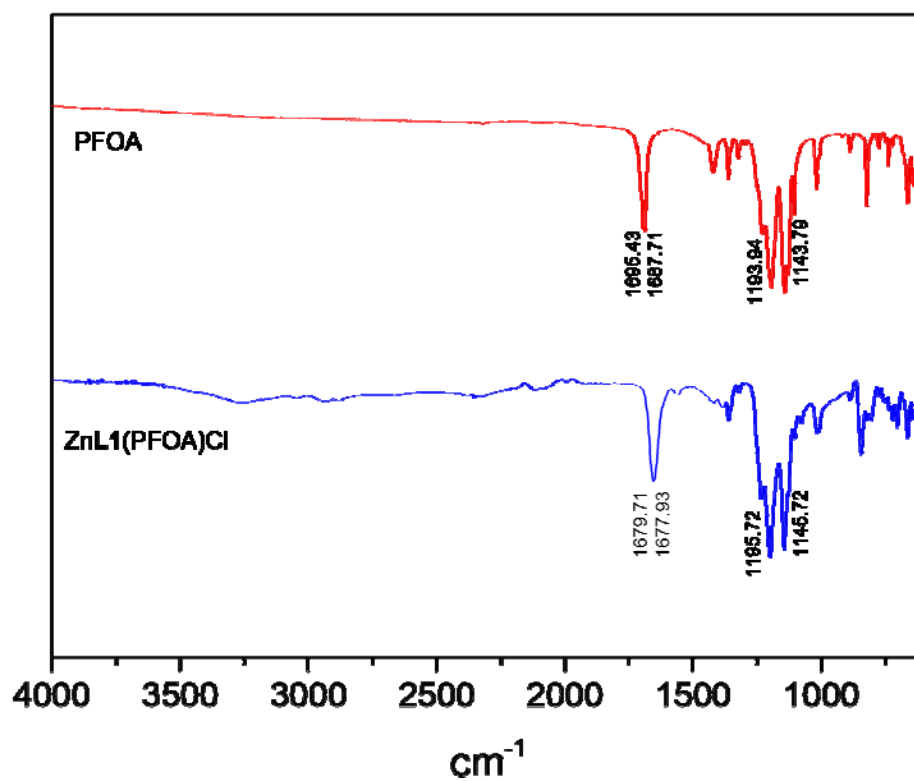

**Figure S35.** FT-IR solid state spectra of PFOA sodium salt and the ZnL1(PFOA)Cl complex.



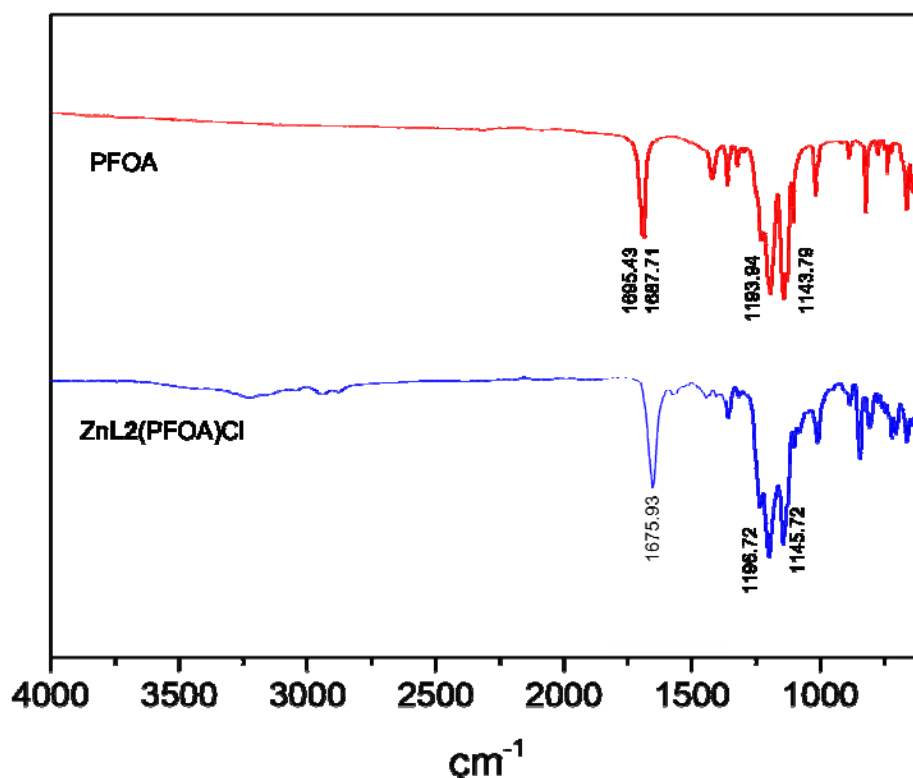

Figure S36. FT-IR solid state spectra of PFOA sodium salt and the ZnL2(PFOA)Cl complex.

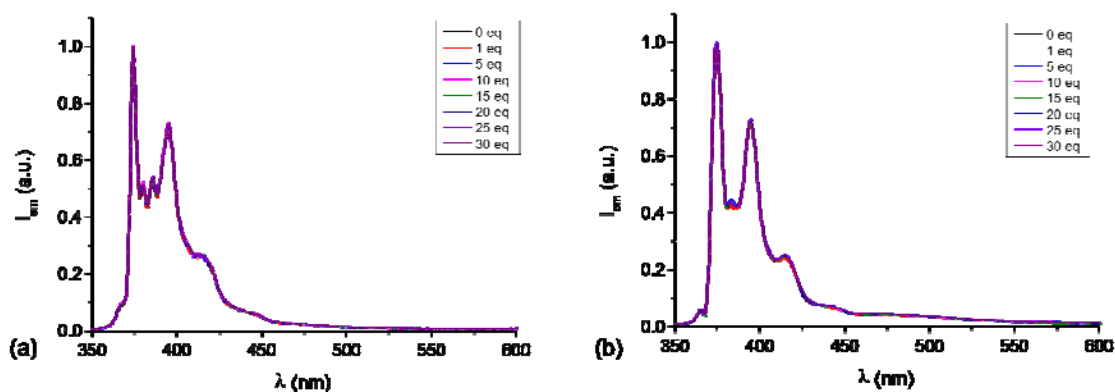

Figure S37. Emission spectra of (a)  $[\text{ZnL1}]^{2+}$  and (b)  $[\text{ZnL2}]^{2+}$  in  $\text{H}_2\text{O}/\text{EtOH}$  (50:50 v/v) at pH 8 in the presence of increasing amount of PFOS ( $[[\text{ZnL1}]^{2+}] = [[\text{ZnL2}]^{2+}] = 10^{-5} \text{ M}$ ,  $\lambda_{\text{exc}} = 340 \text{ nm}$ ).

Table S1. Bond distances and angles defining the Zn(II) coordination environment in the crystal structure of **6**

| Bond Distances |          | Bond Angles |           |
|----------------|----------|-------------|-----------|
| Zn1- N1        | 2.012(2) | Cl1-Zn1-N1  | 107.02(5) |

|          |           |            |           |
|----------|-----------|------------|-----------|
| Zn1- N2  | 2.035(1)  | Cl1-Zn1-N2 | 109.18(5) |
| Zn1- N3  | 2.042(2)  | Cl1-Zn1-N3 | 106.82(5) |
| Zn1- Cl1 | 2.2420(5) | N1-Zn1-N2  | 98.61(7)  |
|          |           | N2-Zn1-N3  | 98.46(7)  |
|          |           | N3-Zn1-N1  | 134.19(7) |

**Table S2.** Crystallographic data and refinement parameters for **6**

|                                                |                                                                                                                    |
|------------------------------------------------|--------------------------------------------------------------------------------------------------------------------|
|                                                | <b>6</b>                                                                                                           |
| Formula                                        | [Zn(C <sub>23</sub> H <sub>25</sub> N <sub>3</sub> )Cl]ClO <sub>4</sub>                                            |
| M                                              | 543.73                                                                                                             |
| T (K)                                          | 100                                                                                                                |
| $\lambda$ (Å)                                  | 1.54184                                                                                                            |
| Crystal system, space group                    | Triclinic, P-1                                                                                                     |
| Unit cell dimensions (Å, °)                    | a = 8.7070(2); $\alpha$ = 77.662(1)<br>b = 11.4358(2); $\beta$ = 86.278(1)<br>c = 12.7837(3); $\gamma$ = 68.582(1) |
| V (Å <sup>3</sup> )                            | 1157.50(4)                                                                                                         |
| Z, $\rho$ (mg/cm <sup>3</sup> )                | 2, 1.560                                                                                                           |
| $\mu$ (mm <sup>-1</sup> )                      | 3.903                                                                                                              |
| F(000)                                         | 560                                                                                                                |
| Crystal size                                   | 0.17x0.18x0.20                                                                                                     |
| $\theta$ range (°)                             | 3.539-72.429                                                                                                       |
| Reflns collected / unique ( $R_{\text{int}}$ ) | 33464 / 4558 (0.0448)                                                                                              |
| Data / parameters                              | 4558 / 379                                                                                                         |
| Final R indices [ $I > 2\sigma$ ]              | 0.0281 / 0.0803                                                                                                    |
| R indices (all data)                           | 0.0305 / 0.0834                                                                                                    |
| GoF                                            | 0.884                                                                                                              |
